# Supplementary material for: Joint association between ambient air pollutant mixture and pediatric asthma exacerbations
Source: PubMed Central journal article supplement (PMC9556053; doi:10.1097/ee9.0000000000000225), 2022-08-15
Supplement: ee9-6-e225-s001.pdf [file ee9-6-e225-s001.pdf]

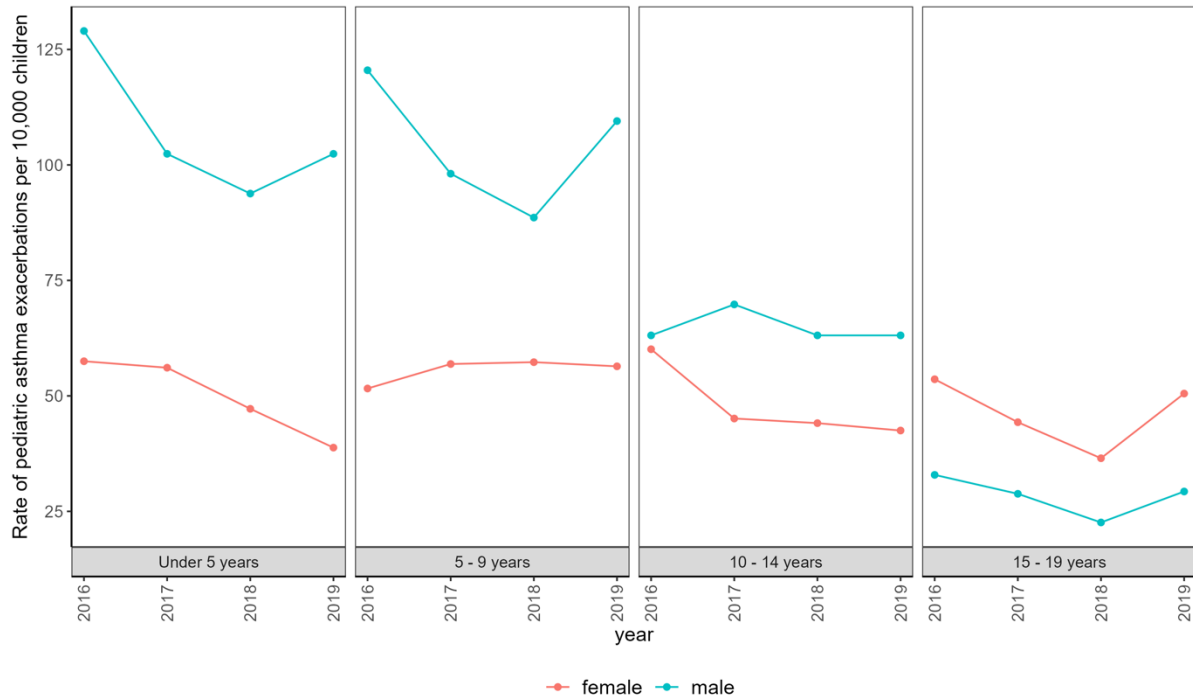

S 1A. Rate of pediatric asthma exacerbations per 10,000 children stratified by age groups and gender (2016-2019).

S 1B. Number of pediatric asthma exacerbations per age group, gender, and year

| Male             |                      |     |       |       |
|------------------|----------------------|-----|-------|-------|
| Year of ED visit | Age group (in years) |     |       |       |
|                  | Under 5              | 5-9 | 10-14 | 15-19 |
| 2016             | 286                  | 253 | 131   | 64    |
| 2017             | 227                  | 206 | 145   | 56    |
| 2018             | 208                  | 186 | 131   | 44    |
| 2019             | 227                  | 230 | 131   | 57    |

  

| Female           |                      |     |       |       |
|------------------|----------------------|-----|-------|-------|
| Year of ED visit | Age group (in years) |     |       |       |
|                  | Under 5              | 5-9 | 10-14 | 15-19 |
| 2016             | 123                  | 107 | 116   | 103   |
| 2017             | 120                  | 118 | 87    | 85    |
| 2018             | 101                  | 119 | 85    | 70    |
| 2019             | 83                   | 117 | 82    | 97    |

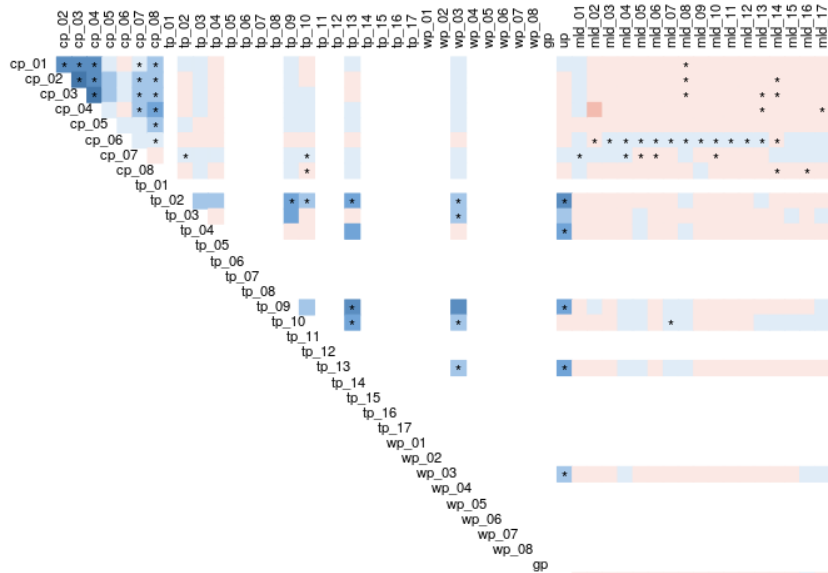

S 2A. Spearman correlation coefficients – winter

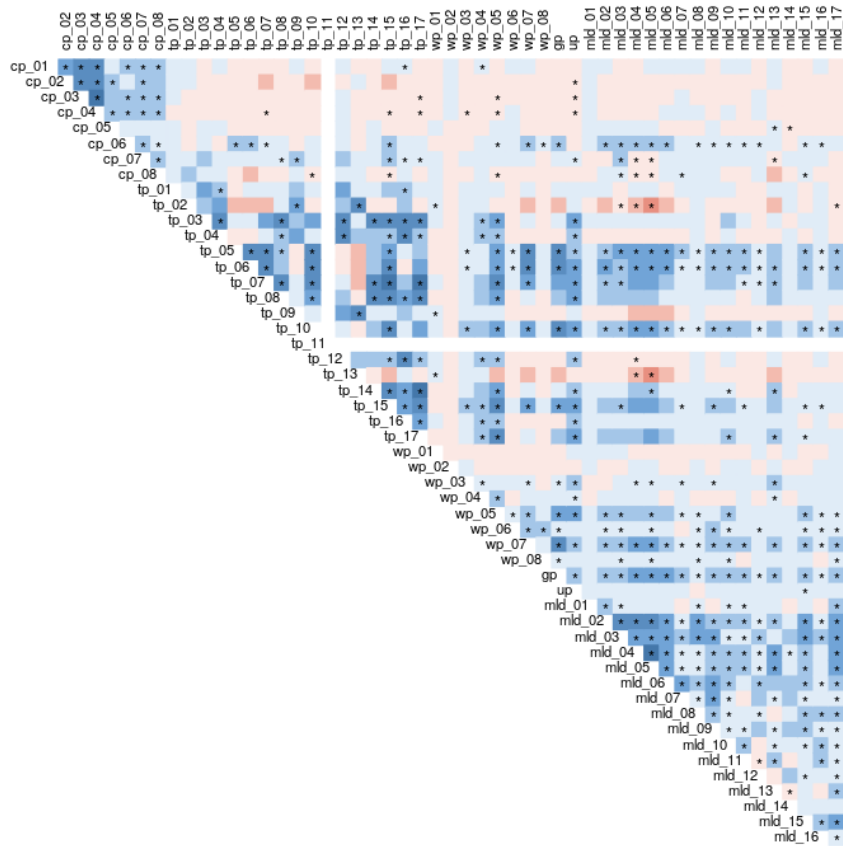

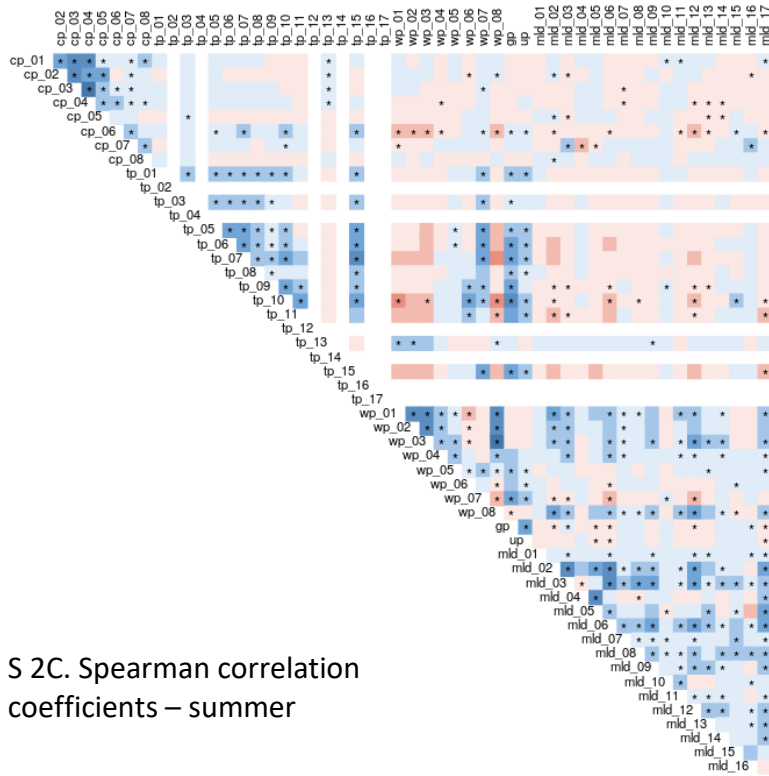

S 2C. Spearman correlation coefficients – summer

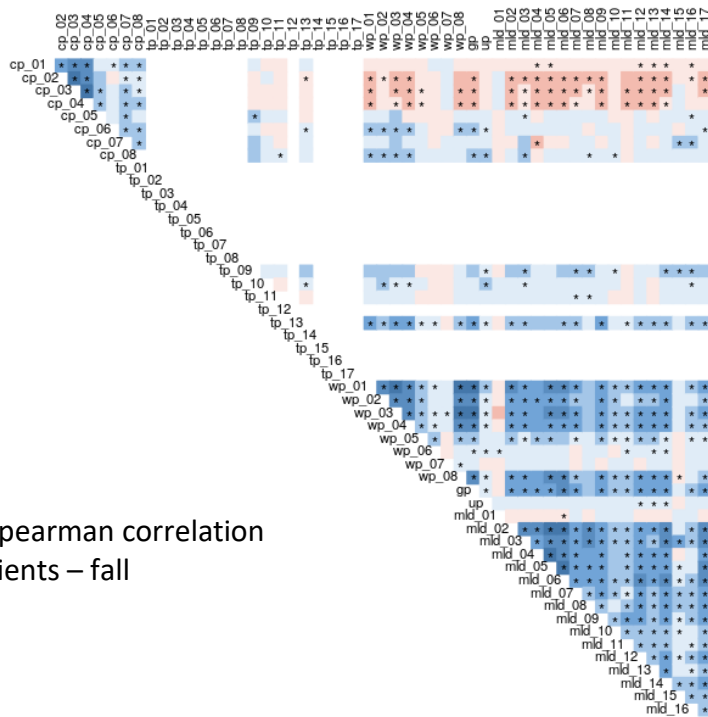

S 2D. Spearman correlation coefficients – fall

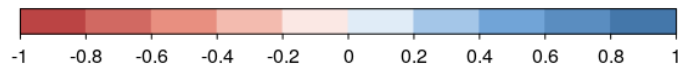

S 2A-D. Correlation between air pollutants during winter season. The correlation coefficients were estimated using Spearman method and the combination of air pollutants with statistically significant correlation ( $p$ -value $<0.05$ ) are represented using asterisk sign. cp-Criteria pollutants, tp-tree pollen, wp-weed pollen, gp-grass pollen, up-unknown pollen, and mld-mold. The abbreviations for the air pollutants are available at:

[https://github.com/jagadeeshpuvvula/air\\_quality\\_asthma/blob/main/06.3\\_abbreviations](https://github.com/jagadeeshpuvvula/air_quality_asthma/blob/main/06.3_abbreviations)

### S 3. Weekly mean air pollutant levels by season

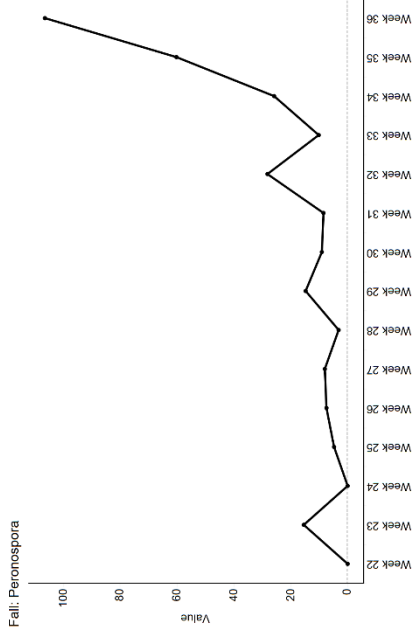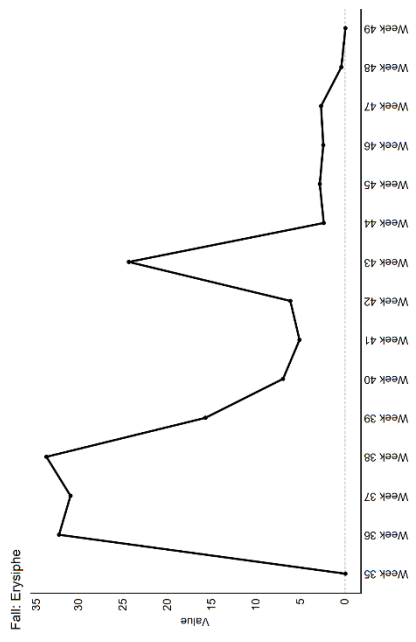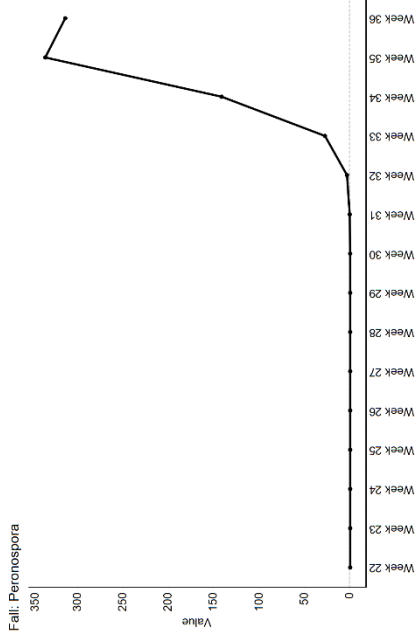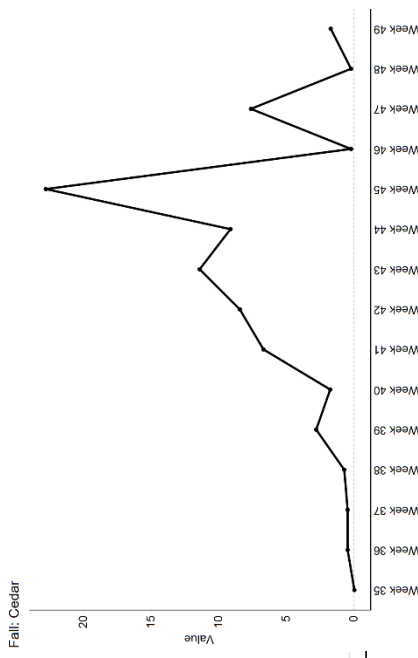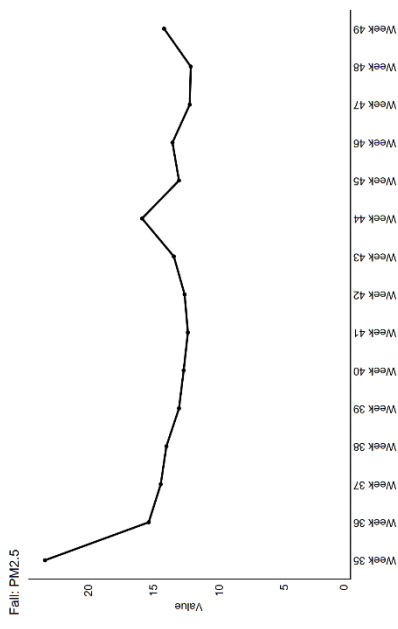

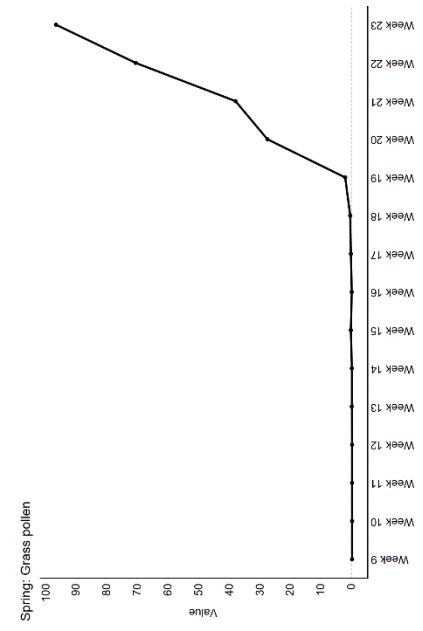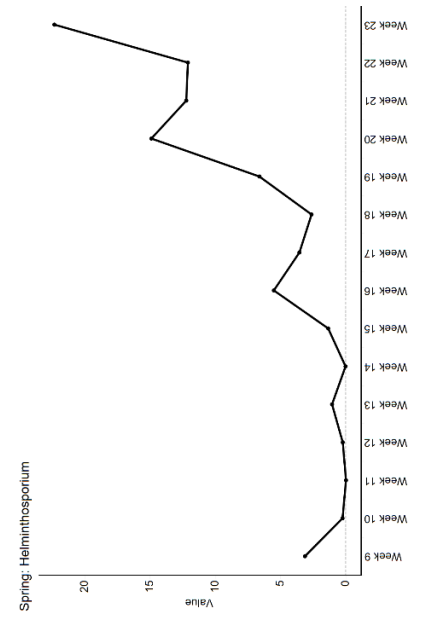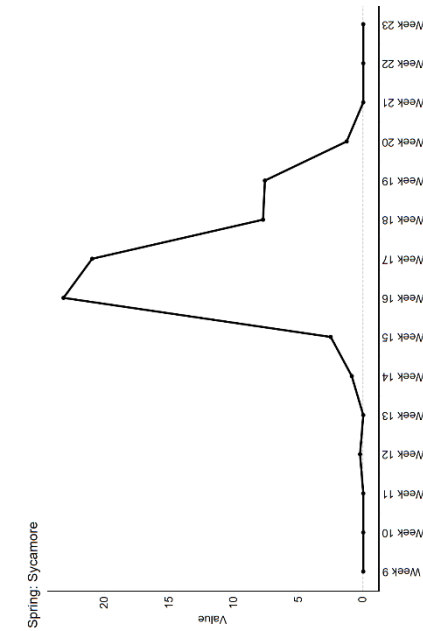

S 4. Descriptive of pediatric asthma exacerbations, criteria pollutants, pollen, and mold, stratified by season. The table includes percent of days with non-zero values, mean, standard deviation (SD), median, 25<sup>th</sup> percentile (Pct25) and 75<sup>th</sup> percentile (pct75). The table as a pdf at available at: [https://github.com/jagadeeshpuvvula/air\\_quality\\_asthma/blob/main/summary.pdf](https://github.com/jagadeeshpuvvula/air_quality_asthma/blob/main/summary.pdf)
